# Supplementary material
Source: MDPI journal article supplement (https://www.mdpi.com/2227-9717/7/10/748)
Supplement: s1 [file s1]

## Article

# Chromium VI and Fluoride Competitive Adsorption on Different Soils and By-Products

Ana Quintáns-Fondo <sup>1</sup>, Gustavo Ferreira-Coelho <sup>1</sup>, Manuel Arias-Estévez <sup>2</sup>,  
Juan Carlos Nóvoa-Muñoz <sup>2</sup>, David Fernández-Calviño <sup>2</sup>, Esperanza Álvarez-Rodríguez <sup>1</sup>,  
María J. Fernández-Sanjurjo <sup>1</sup>, and Avelino Núñez-Delgado <sup>1,\*</sup>

<sup>1</sup> Department of Soil Science and Agricultural Chemistry, Engineering Polytechnic School, Universidade de Santiago de Compostela, 27002 Lugo, Spain; anaquintansfondo@hotmail.com (A.Q.-F.); gf\_coelho@yahoo.com.br (G.F.-C.); esperanza.alvarez@usc.es (E.Á.-R.); mf.sanjurjo@usc.es (M.J.F.-S.)

<sup>2</sup> Department of Plant Biology and Soil Science, Faculty of Sciences, Campus Ourense, Universidade de Vigo, 32004 Ourense, Spain; mastevez@uvigo.es (M.A.-E.); edjuanca@uvigo.es (J.C.N.-M.), davidfc@uvigo.es (D.F.-C.)

\* Correspondence: avelino.nunez@usc.es; Tel.: +34-982-823-140

Received: 24 September 2019; Accepted: 12 October 2019; Published: 15 October 2019

## Materials

We used a forest soil, a vineyard soil, pyritic material, finely ground mussel shell, pine bark, oak ash, hemp waste, and pine sawdust.

The forest soil samples were from an A horizon in a soil developed over granitic rocks near the Alcoa aluminum factory (San Cibrao, Lugo Province, Spain). The vineyard soil was developed over schists, and it was sampled in Sober (Lugo Province, Spain). The pyritic material was from a copper mine tailing (Touro, A Coruña Province, Spain). The finely ground (<1 mm) mussel shells were from the Abonomar S.L. factory (A Illa de Arousa, Pontevedra Province, Spain). The pine bark was a commercial product from Geolia (Madrid), where the <0.63 mm particle size fraction was used after grounding and sieving. The oak ash was from a combustion boiler in Lugo (Spain). The hemp waste, with particle size between 0.63–5 mm, was from an enterprise working on hemp-derived products, situated in Guitiriz (Lugo Province, Spain). The pine sawdust was a commercial product from the market (Vitakraft, Germany).

The forest soil, the vineyard soil, and the pyritic material were sampled at 0–20 cm depth in a zigzag manner (10 subsamples taken to perform each final composite sample). All these samples were air dried and sieved through 2 mm in the laboratory, and chemical determinations were carried out on the <2 mm fraction, with all determinations being performed in triplicate.

## Methods

### *Characterization of the materials used*

An elemental Tru Spec CHNS auto-analyzer (LECO Corporation, St. Joseph, MI, USA) was used to quantify C and N on 5-g samples (Chatterjee et al., 2009) [1]. A pH-meter (model 2001, Crison, L'Hospitalet de Llobregat, Barcelona, Spain), was used to measure pH in water (10 g of solid sample, solid: liquid relation 1:2.5) (McLean, 1982) [2], and to determine values corresponding to the point of zero charge (pH<sub>pzc</sub>) measured as per Mimura et al. (2010) [3]. A 1 M NH<sub>4</sub>Cl solution was used to displace the exchangeable cations from 5-g samples, then Ca, Mg and Al were measured using atomic absorption spectroscopy, and Na and K by atomic emission spectroscopy (AAnalyst 200, Perkin Elmer, Boston, MA, USA) (Sumner and Miller, 1996) [4]; the effective cationic exchange capacity (eCEC) was calculated as the sum of all these cations (Kamprath, 1970) [5]. Total P was quantified on 1-g samples using UV-visible spectroscopy (UV-1201, Shimadzu, Kioto, Japan) after nitric acid (65%) microwave assisted digestion (Tan, 1996) [6]. Total concentrations of Na, K, Ca, Mg, Al, Fe, Mn, as well as As, Cd, Cr, Cu, Ni, Pb, and Zn, were determined using ICP-mass spectrometry (820-NS,

Varian, Palo Alto, CA, USA), after nitric acid (65%) microwave assisted digestion on 1-g samples (Nóbrega et al., 2012) [7]. Total non-crystalline Al and Fe (Al, Fe) were measured using ammonium oxalate solutions acidified to pH 3 with oxalic acid on 1-g samples (Álvarez et al., 2012) [8]. All trials were carried out by triplicate. Table S1 shows the results corresponding to the chemical characterization of the materials assayed. In addition, the particle-size distribution of forest and vineyard soil samples was determined by using the Robinson pipette procedure. Both soils have sandy loam texture. The particle size distribution results were: for forest soil 65% sand, 20% silt and 15% clay; and for vineyard soil 73% sand, 12% silt and 15% clay.

**Table S1.** General characteristics of the sorbent materials (average values for 3 replicates, with coefficients of variation always <5%).

|                                             | Forest soil | Vineyard soil | Pyritic material | Fine shell | Pine bark | Oak ash | Hemp waste | Pine sawdust |
|---------------------------------------------|-------------|---------------|------------------|------------|-----------|---------|------------|--------------|
| C (%)                                       | 4.22        | 2.94          | 0.26             | 11.43      | 46.95     | 11.65   | 36.53      | 46.13        |
| N (%)                                       | 0.33        | 0.23          | 0.04             | 0.21       | 0.32      | 0.21    | 2.81       | 0.03         |
| pH <sub>water</sub>                         | 5.65        | 4.48          | 2.97             | 9.39       | 3.99      | 11.31   | 8.70       | 4.91         |
| pH <sub>pzc</sub>                           | 5.53        | 4.14          | 3.46             | 9.94       | 4.00      | 12.52   | 9.00       | 4.24         |
| Ca <sub>e</sub> (cmol(+) kg <sup>-1</sup> ) | 4.37        | 1.78          | 0.36             | 24.75      | 5.38      | 95.03   | 31.15      | 5.39         |
| Mg <sub>e</sub> (cmol(+) kg <sup>-1</sup> ) | 0.66        | 0.24          | 0.29             | 0.72       | 2.70      | 3.26    | 3.67       | 1.37         |
| Na <sub>e</sub> (cmol(+) kg <sup>-1</sup> ) | 0.33        | 0.14          | 0.14             | 4.37       | 0.46      | 12.17   | 4.19       | 0.66         |
| K <sub>e</sub> (cmol(+) kg <sup>-1</sup> )  | 0.60        | 0.83          | 0.24             | 0.38       | 4.60      | 250.7   | 21.82      | 1.55         |
| Al <sub>e</sub> (cmol(+) kg <sup>-1</sup> ) | 1.92        | 2.28          | 2.86             | 0.03       | 1.78      | 0.07    | <0.001     | 0.05         |
| eCEC (cmol(+) kg <sup>-1</sup> )            | 7.88        | 5.27          | 3.89             | 30.25      | 14.92     | 361.2   | 60.83      | 9.02         |
| P <sub>T</sub> (mg kg <sup>-1</sup> )       | 423.9       | 679.3         | 606.3            | 101.5      | <0.01     | 663.7   | 13,258     | 88.04        |
| Ca <sub>T</sub> (mg kg <sup>-1</sup> )      | 708.5       | 607.1         | 603.0            | 280,168    | 2319      | 136,044 | 6987       | 8088         |
| Mg <sub>T</sub> (mg kg <sup>-1</sup> )      | 830.5       | 5003          | 8384             | 980.6      | 473.6     | 26,171  | 663.0      | 164.4        |
| Na <sub>T</sub> (mg kg <sup>-1</sup> )      | 515.1       | 297.6         | 412.0            | 5173       | 68.92     | 2950    | 10,438     | 98.35        |
| K <sub>T</sub> (mg kg <sup>-1</sup> )       | 1544        | 5441          | 3186             | 202.1      | 737.8     | 99,515  | 0.76       | 540.7        |
| As <sub>T</sub> (mg kg <sup>-1</sup> )      | 4.18        | 3.41          | 7.0              | 1.12       | <0.001    | 8.36    | 8.66       | 0.39         |
| Cr <sub>T</sub> (mg kg <sup>-1</sup> )      | 18.35       | 41.44         | 99.0             | 4.51       | 1.88      | 36.28   | 18.06      | 234.2        |
| Cd <sub>T</sub> (mg kg <sup>-1</sup> )      | 0.43        | 0.14          | 0.08             | 0.07       | 0.13      | 19.93   | 0.08       | 50.82        |
| Cu <sub>T</sub> (mg kg <sup>-1</sup> )      | 15.72       | 521.1         | 773.0            | 6.72       | <0.001    | 146.33  | 8.03       | 14.87        |
| Ni <sub>T</sub> (mg kg <sup>-1</sup> )      | 10.69       | 21.73         | 5.0              | 8.16       | 1.86      | 69.25   | 0.06       | 260.6        |
| Pb <sub>T</sub> (mg kg <sup>-1</sup> )      | 14.02       | 12.73         | 4.0              | <0.01      | 0.17      | 34.11   | n.d.       | n.d.         |
| Zn <sub>T</sub> (mg kg <sup>-1</sup> )      | 36.74       | 49.57         | 58.0             | 7.66       | 6.98      | 853.0   | 73.86      | n.d.         |
| Mn <sub>T</sub> (mg kg <sup>-1</sup> )      | 92.99       | 305.4         | 296              | 33.75      | 30.19     | 10,554  | 577.1      | 5.19         |
| Al <sub>T</sub> (mg kg <sup>-1</sup> )      | 22,676      | 25,664        | 9624             | 433.2      | 561.1     | 14,966  | 2307       | 260.7        |
| Fe <sub>T</sub> (mg kg <sup>-1</sup> )      | 9486        | 21,284        | 135,157          | 1855       | 169.8     | 12,081  | 2061       | 234.2        |
| Al <sub>o</sub> (mg kg <sup>-1</sup> )      | 4275        | 2003          | 563.0            | 178.3      | 315.0     | 8323    | 273.0      | 112.5        |
| Fe <sub>o</sub> (mg kg <sup>-1</sup> )      | 2333        | 1239          | 41860            | 171.0      | 74.02     | 4233    | 322.2      | 15.62        |

X<sub>e</sub>: exchangeable concentration of the element; X<sub>T</sub>: total concentration of the element; Al, Fe: extracted with ammonium oxalate; n.d.: not detected

## Infrared spectroscopy

In addition to the parameters commented above, some additional characteristics (including the main functional groups present in each material) were determined by infrared spectroscopy on a FTIR-Bomen MB102 equipment (ABB, Switzerland). The spectra were obtained by transmittance using KBr pellets, performing determinations in the region between 400 and 4000  $\text{cm}^{-1}$ , with a resolution of 4  $\text{cm}^{-1}$ .

### Forest soil

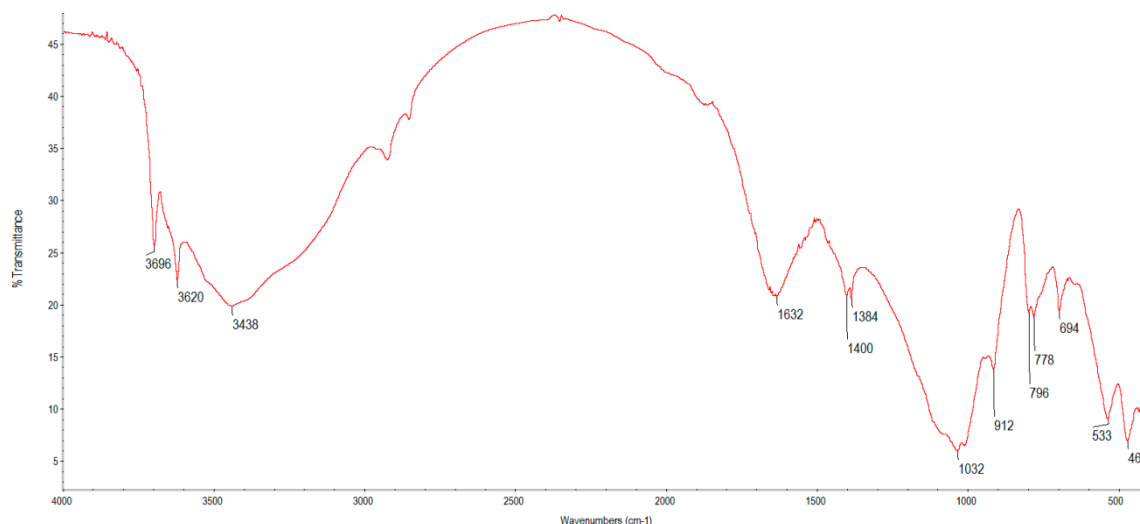

**Figure S1.** Infrared spectrum of forest soil.

The band at 3696  $\text{cm}^{-1}$  can be related to the presence of kaolinite, with bands at 3621 and 912  $\text{cm}^{-1}$  being typical for clay minerals (Dlapa et al., 2013) [9]. Saikia and Parthasarathy (2010) [10] also indicate that a typical spectrum of kaolin should present bands at 3697 and 3620  $\text{cm}^{-1}$  (among other). Taking into account that indicated by Haberhauer and Gerzabek (1999) [11], the band at 3438  $\text{cm}^{-1}$  would be due to stretching vibration of bonded and non-bonded hydroxyl groups, the one at 1632 would be related to C = O vibrations of carboxylates and aromatic vibrations, although it could be related to H-O-H bending of water (Saikia and Parthasarathy, 2010) [10]. Tinti et al. (2015) [12] indicate that a band at approximately 1400  $\text{cm}^{-1}$  is present in different clay materials, whereas a band at about 1380  $\text{cm}^{-1}$  would be due to coordinatively bound water. As per Margenot et al. (2017) [13], a single broad peak at 1030–1010  $\text{cm}^{-1}$  can be related to the 2:1 layer silicates. Haberhauer and Gerzabek (1999) [11] also indicate that a band at about 1050 would be indicative of polysaccharides, or of Si-O vibrations of clay minerals, and bands at about 780, 690 and 540  $\text{cm}^{-1}$  would be due to clay, quartz minerals or other inorganic materials.

### Vineyard soil

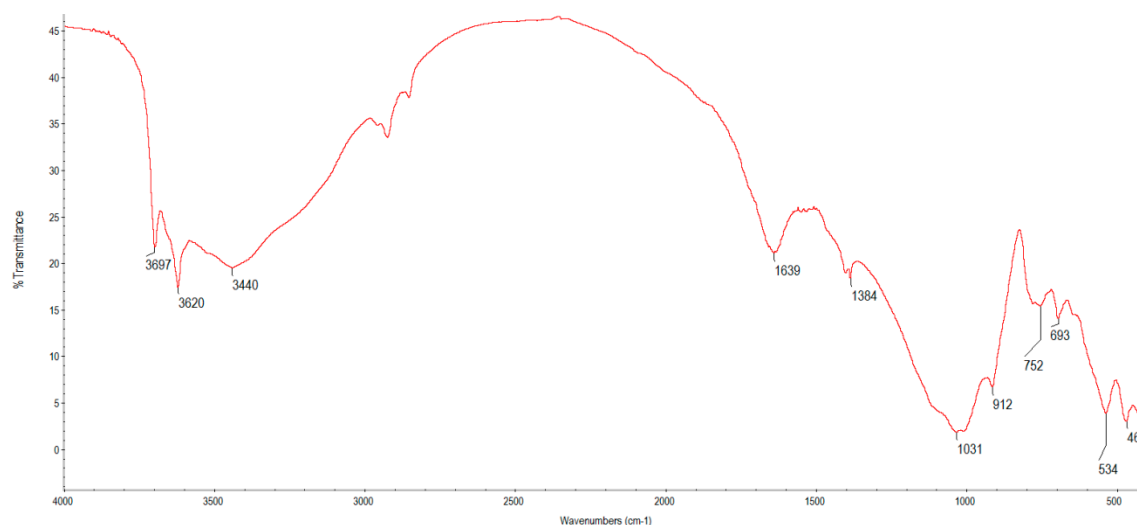

**Figure S2.** Infrared spectrum of vineyard soil.

As in the case of the forest soil, the band at  $3697\text{ cm}^{-1}$  would be related to the presence of kaolinite, with this band and those at  $3620$  and  $912\text{ cm}^{-1}$  being typical for clay minerals (Dlapa et al., 2013) [9]. The band at  $3440\text{ cm}^{-1}$  would be due to H-O-H stretching of adsorbed water (Saikia and Parthasarathy, 2010) [10], whereas the band at  $1639$  could be related to H-O-H bending of water (although it could be related to C=O vibrations of carboxylates and aromatic vibrations -Haberhauer and Gerzabek, 1999) [11]. As per Sila et al. (2016) [14], a band at about  $1639\text{ cm}^{-1}$  would be due to the clay mineral montmorillonite. Tinti et al. (2015)[12] indicate that a band at about  $1380\text{ cm}^{-1}$  would be due to coordinatively bound water. Saikia and Parthasarathy (2010) [10] indicate that a band at about  $1031\text{ cm}^{-1}$  could be assigned to Si-O stretching of clay minerals. As per Margenot et al. (2017) [13], a single broad peak at  $1030\text{--}1010\text{ cm}^{-1}$  can be related to the 2:1 layer silicates. The vineyard soil also showed bands at  $693$ ,  $534$ , and  $466\text{ cm}^{-1}$ , coincident or very close to bands present in the forest soil, and again some of them could be related to that indicated by Haberhauer and Gerzabek (1999) [11]: specifically, bands at about  $690$  and  $540\text{ cm}^{-1}$  would be due to clay, quartz minerals or other inorganic materials.

### Pyritic material

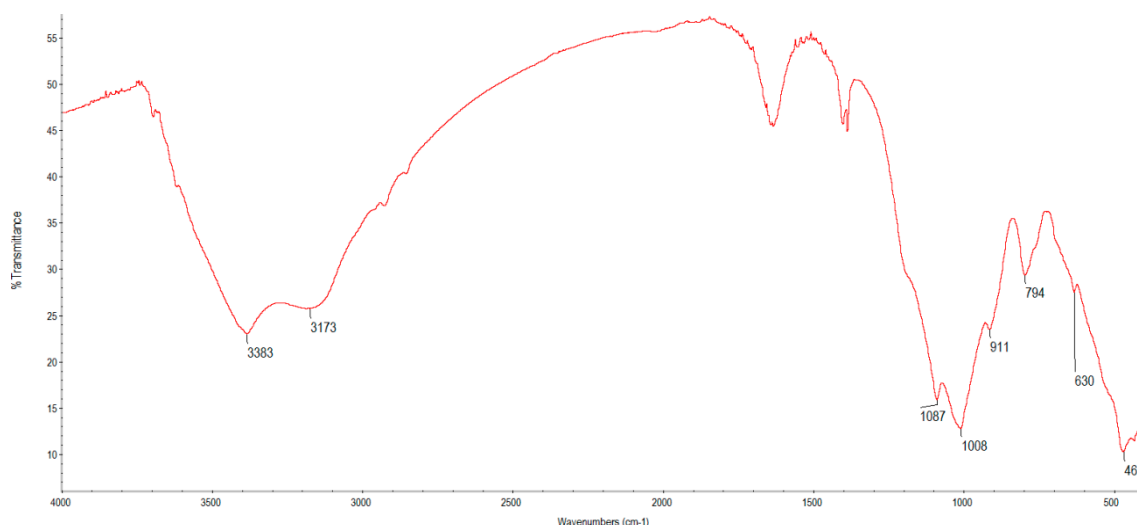

**Figure S3.** Infrared spectrum of pyritic material.

In the pyritic material, the band at 3383 may be related to O-H and N-H stretching, and H-bonded OH (Tinti et al., 2015; Margenot et al., 2017) [12,13], the band at 1087  $\text{cm}^{-1}$  may be due to S-O bonds, or to phosphate (Pavia et al., 2010) [15]. Alejano et al [16]. (2014) indicated that characteristic SO functional group bands (corresponding to sulfate), placed at about 474, 512, 871 and 977  $\text{cm}^{-1}$ , can be detected both in non-altered and altered pyrite, whereas a band at about 3600  $\text{cm}^{-1}$  can be related to OH groups in coordination with metals, which would be due to iron hydroxides (frequent in altered pyrite).

### Fine mussel shell

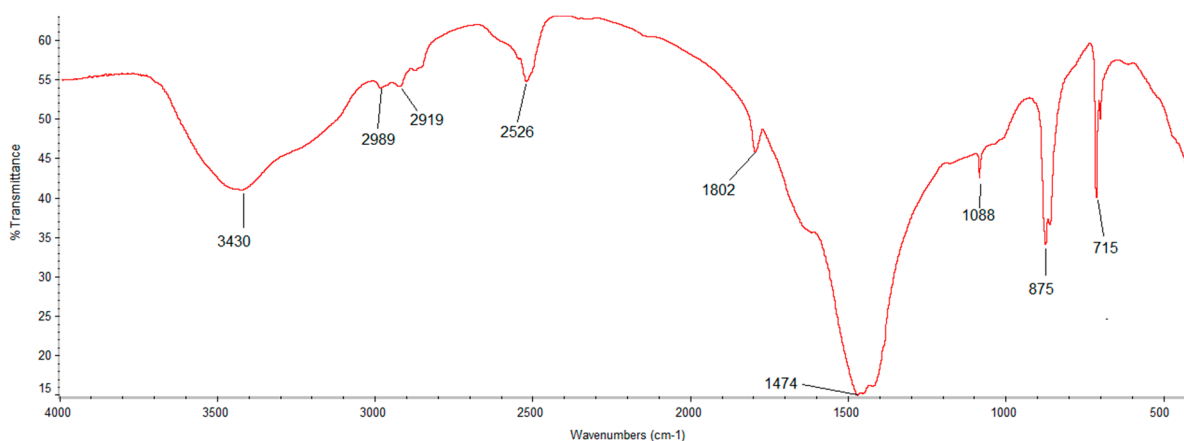

**Figure S4.** Infrared spectrum of fine mussel shell.

The band at 3430  $\text{cm}^{-1}$  may be related to N-H bonds, and at 2989 and 2919  $\text{cm}^{-1}$  to C-H groups. At 2526  $\text{cm}^{-1}$  it may be related to the presence of carbonate groups (Movasaghi et al., 2008; Smidt and Meissl, 2007) [17,18]. The band at 1802  $\text{cm}^{-1}$  may be related to the presence of C = O bindings in acids (Pavia et al., 2010) [15]. At 1474  $\text{cm}^{-1}$  may be due to  $\text{CH}_2$ - bonds, and at 1088  $\text{cm}^{-1}$  to S-O bonds, or to phosphates (Pavia et al., 2010) [15]. The band at 875  $\text{cm}^{-1}$  could be due to C-O bonds in carbonates, and at 715  $\text{cm}^{-1}$  to N-H bonds (Movasaghi et al., 2008; Smidt and Meissl, 2007) [17,18].

### Pine bark

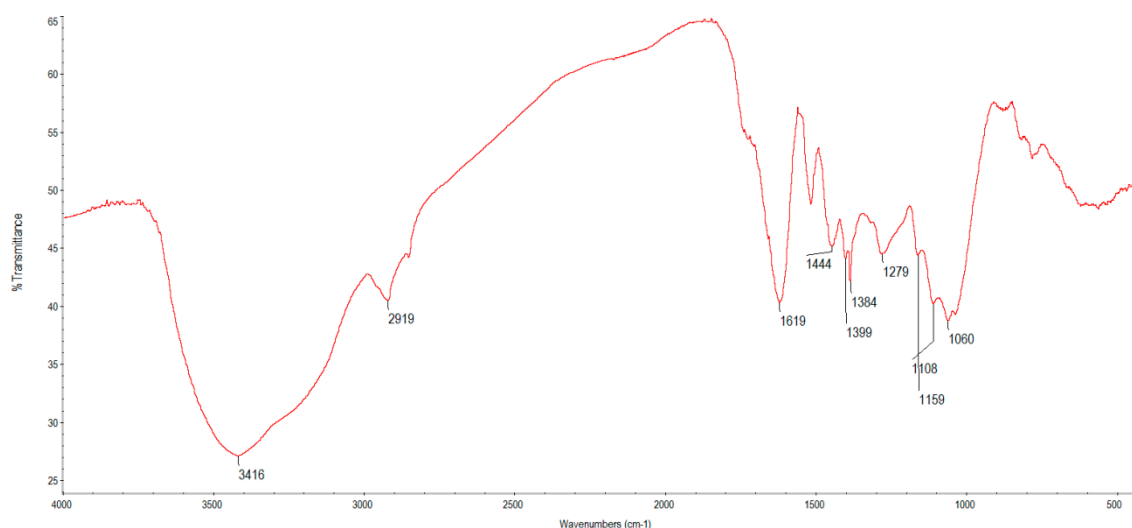

**Figure S5.** Infrared spectrum of pine bark.

In the case of pine bark, FTIR spectrum shows details very similar to those previously found by Brás et al. (2004) [19]. Specifically, the band at 3416  $\text{cm}^{-1}$  would be due to the bond between the oxygen and the hydrogen stretching vibration; the one at 2919 would correspond to the stretching C-H bond in the aromatic and aliphatic structures; the one situated at 1619 would be due to the aromatic C = C

skeletal vibrations; the band at 1444 would be caused by C-H deformation; and the one at 1159 would be in relation to the asymmetric stretching of C-O-C in cellulose and hemicellulose (Brás et al., 2004) [19]. Fackler et al. (2010) [20] indicate that the band at 1108 may correspond to ring asymmetric valence vibration of polysaccharides, whereas the band at 1060 may be due to C<sub>3</sub>-O<sub>3</sub>H valence vibration, mainly from polysaccharides.

### Oak ash

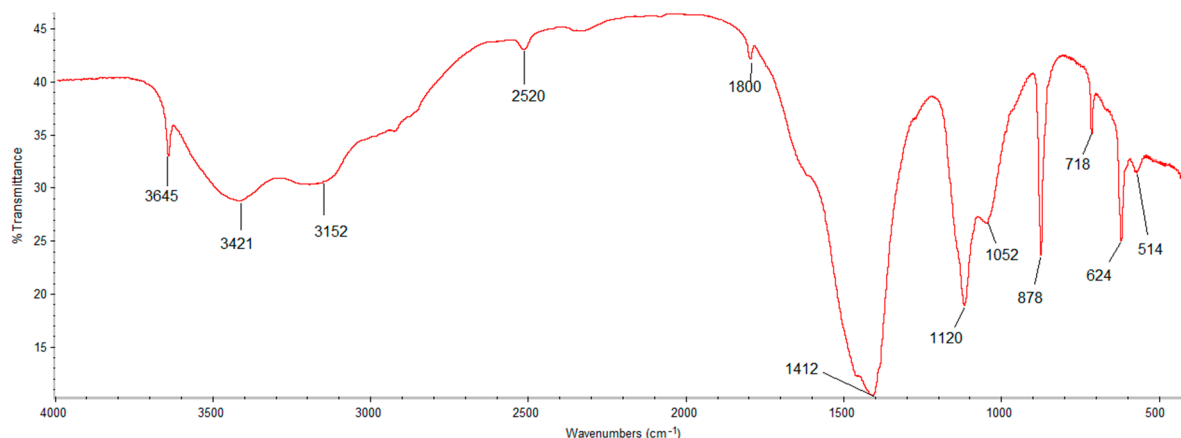

Figure S6. Infrared spectrum of oak ash.

The band at 3645 cm<sup>-1</sup> can be related to O-H stretching for some primary alcohol structures (Pavia et al., 2010) [15]. The band in the 3421 cm<sup>-1</sup> region can be attributed to O-H and N-H bonds, due to the presence of hydroxyl, carboxyl, amine and amide groups (Movasaghi et al., 2008; Smidt and Meissl, 2007; Pavia et al., 2010) [15–18]. The band at 3152 cm<sup>-1</sup> may be related to the stretching of N-H groups of amines and primary and secondary amides (Pavia et al., 2010) [15]. Stretching at 2520 cm<sup>-1</sup> may be related to O-H bonds in carboxylic acids (Pavia et al., 2010) [15] or to carbonates (Smidt and Meissl, 2007) [18]. The band at 1800 cm<sup>-1</sup> may be related to the presence of C=O binding in acids (Pavia et al., 2010) [15]. At 1412 cm<sup>-1</sup>, to the presence of nitrates, and C-N, N-H and C-H bonds (Movasaghi et al., 2008; Smidt and Meissl, 2007) [17,18] or also to folding deformation of -CH<sub>3</sub> in alkane groups. The band at 1120 cm<sup>-1</sup> may be related to the presence of fluoride, C-N-bond amines, or C-O bonds of alcohols, or carboxylic acids (Pavia et al., 2010) [15]. It may also be related to C-O-C, C-O, or C-O-P bonds (Movasaghi et al., 2008; Smidt and Meissl, 2007) [17,18]. The band at 1052 cm<sup>-1</sup> can suggest a C-O bond, phosphate groups (Movasaghi et al., 2008; Smidt and Meissl, 2007) [10,21] and sulfoxides (Pavia et al., 2010) [15], whereas the band at 878 cm<sup>-1</sup> can be due to C-O bonds in carbonates. The band at 718 cm<sup>-1</sup> can be due to N-H bonds, at 624 cm<sup>-1</sup> may be due to S-O bonds, and at 514 cm<sup>-1</sup> may be C = C bonds (Movasaghi et al., 2008; Smidt and Meissl, 2007) [17,18].

### Hemp waste

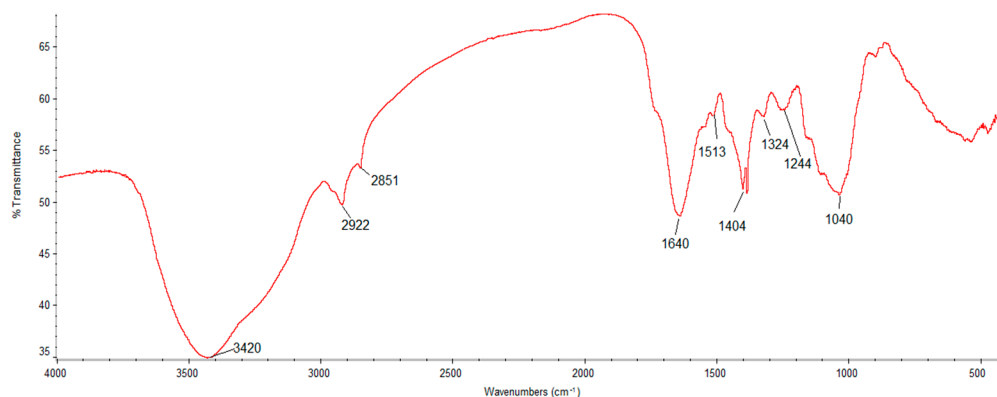

Figure S7. Infrared spectrum of hemp waste.

The wide band in the  $3420\text{ cm}^{-1}$  region can be attributed to stretching vibration of the O-H bond, suggesting the presence of hydroxyl groups ( $\text{OH}^-$ ) found in cellulose, lignin and water (Smidt and Meissl, 2007; Tarley and Arruda, 2004; Rubio et al., 2013) [18,21,22]. The bands at  $2922$  and  $2851\text{ cm}^{-1}$  can be related to the stretching vibration of C-H and  $\text{CH}_2$  of alkane and aliphatic acids groups (Movasaghi, et al., 2008) [17], also found in cashew nut shell (Coelho et al., 2014) [23]. The band at  $1640\text{ cm}^{-1}$  can be attributed to C = C bonds in alkenes, or to C = O bonds in amides (Pavia et al., 2010) [15]. The band at  $1513$  can be related to a CH bond in a phenolic ring in lignin (Movasaghi et al., 2008) [17]. A folding  $-\text{CH}_3$  deformation can be found at  $1404\text{ cm}^{-1}$ , relating to alkane groups (Pavia et al., 2010) [15]. According to these authors, C-N bonds corresponding to aromatic amines can be found in the region  $1324\text{ cm}^{-1}$ . The stretching in the frequencies  $1244$  and  $1040\text{ cm}^{-1}$  can be attributed to the presence of asymmetric phosphate groups, C-O of carboxylic acids, and C-O-C, C-O, C-O-P of polysaccharides (Movasaghi et al, 2008; Smidt and Meissl, 2007; Pavia et al., 2010) [15,17,18].

### Pine sawdust

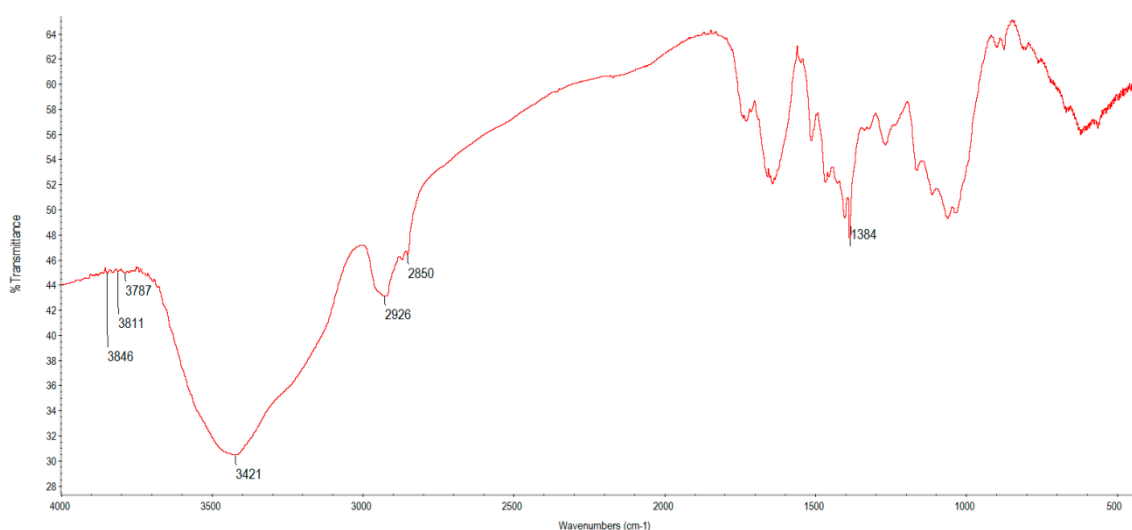

**Figure S8.** Infrared spectrum of pine sawdust.

As in previous case, the wide band in the  $3420\text{ cm}^{-1}$  region can be attributed to stretching vibration of the O-H bond, suggesting the presence of hydroxyl groups ( $\text{OH}^-$ ) found in cellulose, lignin and water (Rubio et al., 2013; Smidt and Meissl, 2007; Tarley and Arruda, 2004) [18,21,22]. An interpretation presented in Banerjee and Chattopadhyaya (2017) [24] indicates that the peak at  $2850\text{ cm}^{-1}$  would correspond to  $-\text{CH}_2$  stretching of aliphatic groups, while other groups not remarked in our spectrum (as those at  $1637\text{ cm}^{-1}$  and  $1321\text{ cm}^{-1}$ ) would indicate the presence of C,C stretching of phenol group, and C-N stretching of the amine group respectively, and those appearing at  $1119\text{ cm}^{-1}$  and  $1032\text{ cm}^{-1}$  contribute to C-O stretching of the phenolic group and a strong C-O bond due to ether group of cellulose, respectively.

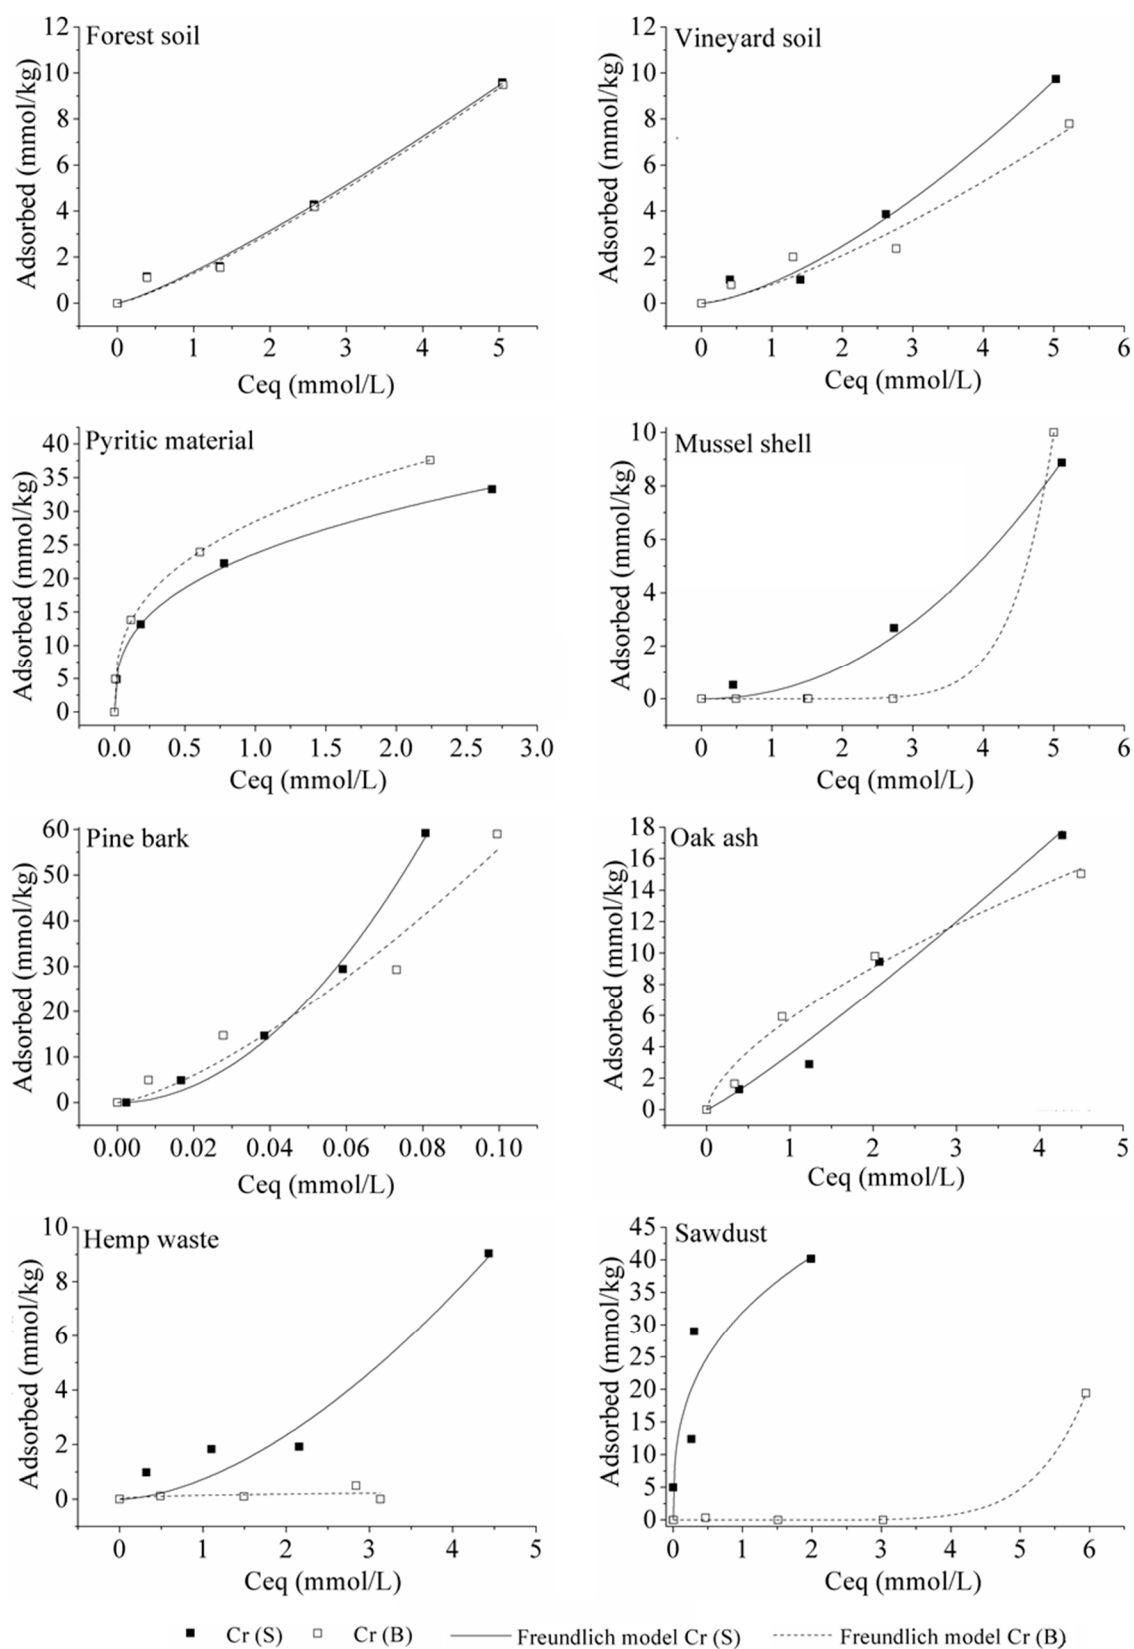

**Figure S9.** Fitting of Cr(VI) adsorption data to the Freundlich model for simple (S) and binary (B) experiments.



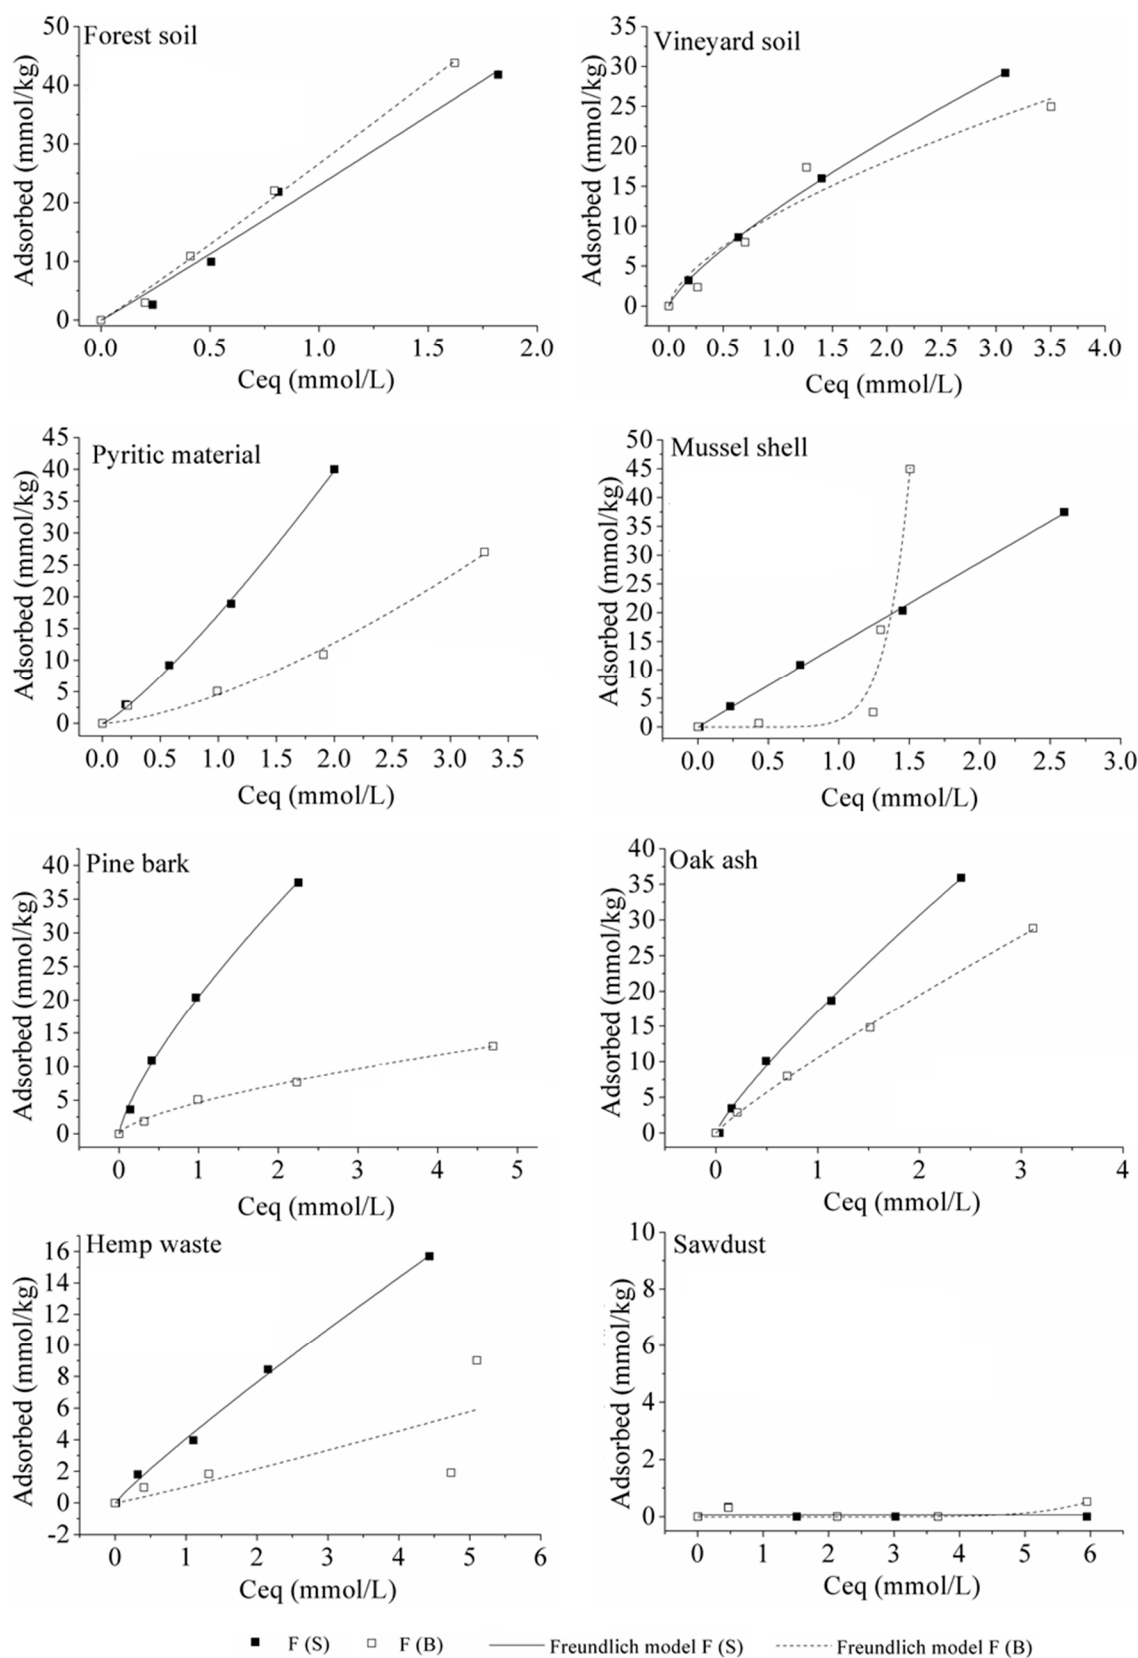

**Figure S10.** Fitting of F- adsorption data to the Freundlich model for simple (S) and binary (B) experiments.

## References

- Chatterjee, A.; Lal, R.; Wielopolski, L.; Martin, M.Z.; Ebinger, M.H. Evaluation of different soil carbon determination methods. *Crit. Rev. Plant Sci.* **2009**, *28*, 164–178.
- McLean, E.O. Soil pH and lime requirement. In *Methods of Soil Analysis, Part 2, Chemical and Microbiological Properties*; ASA: Madison, WI, USA, 1982; pp. 199–223.
- Mimura, A.M.S.; Vieira, T.V.A.; Martinelli, P.B.; Gorgulho, H.F. Utilization of rice husk to remove  $\text{Cu}^{2+}$ ,  $\text{Al}^{3+}$ ,  $\text{Ni}^{2+}$  and  $\text{Zn}^{2+}$  from wastewater. *Química Nova* **2010**, *33*, 1279–1284.
- Sumner, M.E.; Miller, W.P. Cation exchange capacity and exchange coefficients. In *Methods of Soil Analysis, Part 3, Chemical Methods*; ASA: Madison, WI, USA, 1996; pp. 437–474.
- Kamprath, E.J. Exchangeable aluminium as a criterion for liming leached mineral soils. *Soil Sci. Soc. Am. Proc.* **1970**, *34*, 252–254.
- Tan, K.H. *Soil Sampling, Preparation, and Analysis*; Marcel Dekker: New York, NY, USA, 1996.
- Nóbrega, J.A.; Pirola, C.; Fialho, L.L.; Rota, G.; de Campos, C.E.; Pollo, F. Microwave-assisted digestion of organic samples: How simple can it become? *Talanta* **2012**, *98*, 272–276.
- Álvarez, E.; Fernández-Sanjurjo, M.J.; Núñez, A.; Seco, N.; Corti, G. Aluminium fractionation and speciation in bulk and rhizosphere of a grass soil amended with mussel shells or lime. *Geoderma* **2012**, *173–174*, 322–329.
- Dlapa, P.; Bodí, M.B.; Mataix-Solera, J.; Cerdà, A.; Doerr, S.H. FT-IR spectroscopy reveals that ash water repellency is highly dependent on ash chemical composition. *Catena* **2013**, *108*, 35–43.
- Saikia, B.J.; Parthasarathy, G. Fourier transform infrared spectroscopic characterization of kaolinite from Assam and Meghalaya, Northeastern India. *J. Mod. Phys.* **2010**, *1*, 206–210.
- Haberhauer, G.; Gerzabek, M.H. Drift and transmission FT-IR spectroscopy of forest soils: An approach to determine decomposition processes of forest litter. *Vib. Spectrosc.* **1999**, *19*, 413–417.
- Tinti, A.; Tugnoli, V.; Bonora, S.; Francioso, O. Recent applications of vibrational mid-Infrared (IR) spectroscopy for studying soil components: A review. *J. Cent. Eur. Agric.* **2015**, *16*, doi:10.5513/JCEA01/16.1.1535.
- Margenot, A.J.; Calderón, F.J.; Goyne, K.W.; Mukome, F.N.D.; Parikh, S.J. IR spectroscopy, soil analysis applications. In *Encyclopedia of Spectroscopy and Spectrometry*, 3rd ed.; Elsevier Inc.: Amsterdam, The Netherlands, 2017; Volume 2, pp. 448–454.
- Sila, A.M.; Shepherd, K.D.; Pokhariyal, G.P. Evaluating the utility of mid-infrared spectral subspaces for predicting soil properties. *Chemom. Intell. Lab. Syst.* **2016**, *153*, 92–105.
- Pavia, D.L.; Lampman, G.M.; Kriz, G.S.; Vyvyan, J.R. *Introdução à Espectroscopia*, 4th ed.; Cengage Learning: São Paulo, Brasil, 2010; p. 700.
- Alejano, L.R.; Peruchó, A.; Olalla, C.; Jiménez, R. *Rock Engineering and Rock Mechanics: Structures in and on Rock Masses*; CRC Press: London, UK, 2014; p. 372.
- Movasaghi, Z.; Rehman, S.; Rehman, I. Fourier transform infrared (FTIR) spectroscopy of biological tissues. *Appl. Spectrosc. Rev.* **2008**, *43*, 134–179.
- Smidt, W.; Meissl, K. The applicability of Fourier transform infrared (FT-IR) spectroscopy in waste management. *Waste Manag.* **2007**, *27*, 268–276.
- Brás, I.; Teixeira-Lemos, L.; Alves, A.; Pereira, M.F.R. Application of pine bark as a sorbent for organic pollutants in effluents. *Manag. Environ. Qual. Int. J.* **2004**, *15*, 491–501.
- Fackler, K.; Stevanic, J.S.; Ters, T.; Hinterstoisser, B.; Schwanninger, M.; Salmén, L. Localisation and characterisation of incipient brown-rot decay within spruce wood cell walls using FT-IR imaging microscopy. *Enzym. Microb. Technol.* **2010**, *47*, 257–267.
- Rubio, F.; Gonçalves, A.C., Jr.; Meneghel, A.P.; Tarley, C.R.T.; Schwantes, D.; Coelho, G.F. Removal of cadmium from water using by-product *Crambe abyssinica* Hochst seeds as biosorbent material. *Water Sci. Technol.* **2013**, *68*, 227–233.
- Tarley, C.R.T.; Arruda, M.A.Z. Biosorption of heavy metals using rice milling by-products. Characterisation and application for removal of metals from aqueous effluents. *Chemosphere* **2004**, *54*, 987–995.
- Coelho, G.F.; Gonçalves, A.C., Jr.; Tarley, C.R.T.; Casarin, J.; Nacke, N.; Francziskowski, M.A. Removal of metal ions Cd (II), Pb (II) and Cr (III) from water by the cashew nut shell *Anarcadium occidentale* L. *Ecol. Eng.* **2014**, *73*, 514–525.

24. Banerjee, S.; Chattopadhyaya, M.C. Adsorption characteristics for the removal of a toxic dye, tartrazine from aqueous solutions by a low cost agricultural by-product. *Arab. J. Chem.* **2017**, *10*, S1629–S1638, doi:10.1016/j.arabjc.2013.06.005.

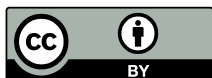

© 2018 by the authors. Submitted for possible open access publication under the terms and conditions of the Creative Commons Attribution (CC BY) license (<http://creativecommons.org/licenses/by/4.0/>).
